# Supplementary material for: GSAG:Ce scintillator: insights from yttrium admixture
Source: Royal Society of Chemistry journal article supplement (doi:10.1039/d4ra07622b), 2025-01-01
Supplement: d4ra07622b1.pdf [file d4ra07622b1.pdf]

# GSAG:Ce Scintillator: Insights from Yttrium Admixture

Authors: Ondřej Zapadlík<sup>a,b,c\*</sup>, Jan Pejchal<sup>b</sup>, Vladimír Babin<sup>b</sup>, Vítězslav Jary<sup>b</sup>, Vojtěch Vaněček<sup>b</sup>, Romana Kučerková<sup>b</sup>, Karel Jurek<sup>b</sup>, Alena Beitlerová<sup>b</sup> and Martin Nikl<sup>b</sup>

<sup>a</sup> CRYTUR, Ltd., Na Lukách 2283, Turnov, 511 01, Czech Republic

<sup>b</sup> Institute of Physics of the Czech Academy of Sciences, Cukrovarnická 10/112, 160 00 Prague, Czech Republic

<sup>c</sup> Faculty of Nuclear Sciences and Physical Engineering, Czech Technical University in Prague, Břehová 78/7, 115 19 Prague, Czech Republic

## Supplementary information

Gd<sub>2.2</sub>Y<sub>0.8</sub>

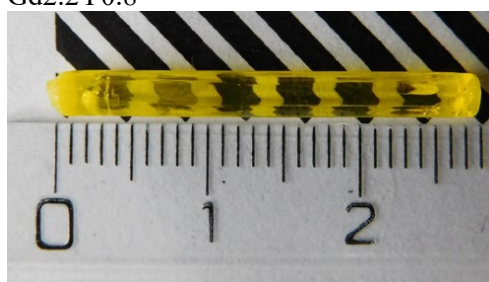

Gd<sub>2.5</sub>Y<sub>0.5</sub>

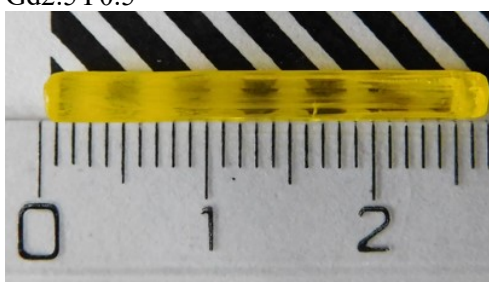

Gd<sub>2.8</sub>Y<sub>0.2</sub>

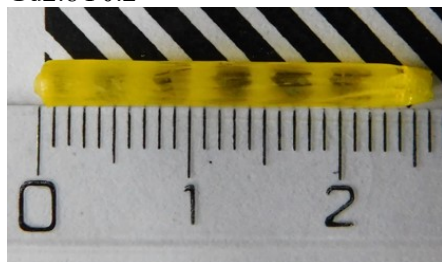

Gd<sub>3</sub>Y<sub>0</sub>

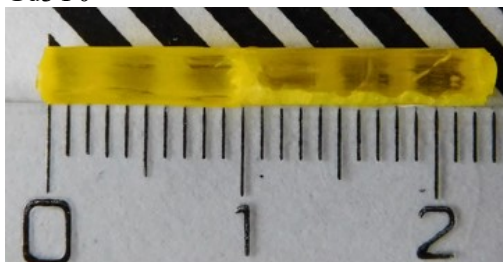

Figure S1: Photographs of GYSAG:Ce set grown by the  $\mu$ -PD crystal grown method.

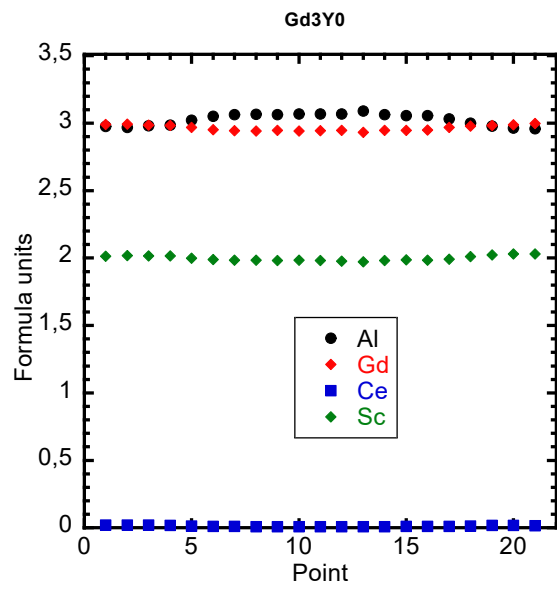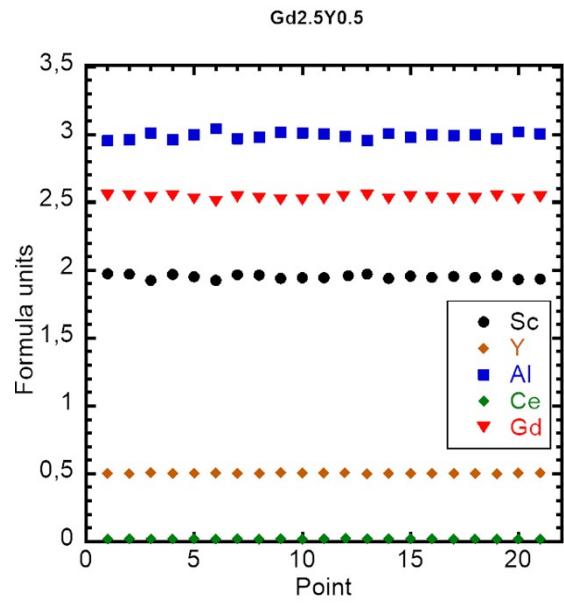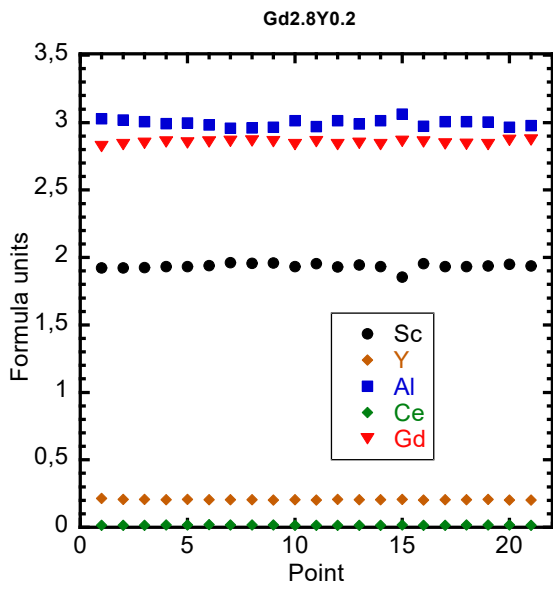

Figure S2: EPMA analysis of Gd2.5Y0.5, Gd2.8Y0.2 and Gd3Y0.

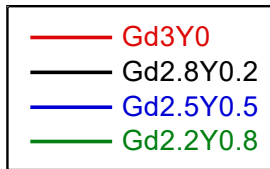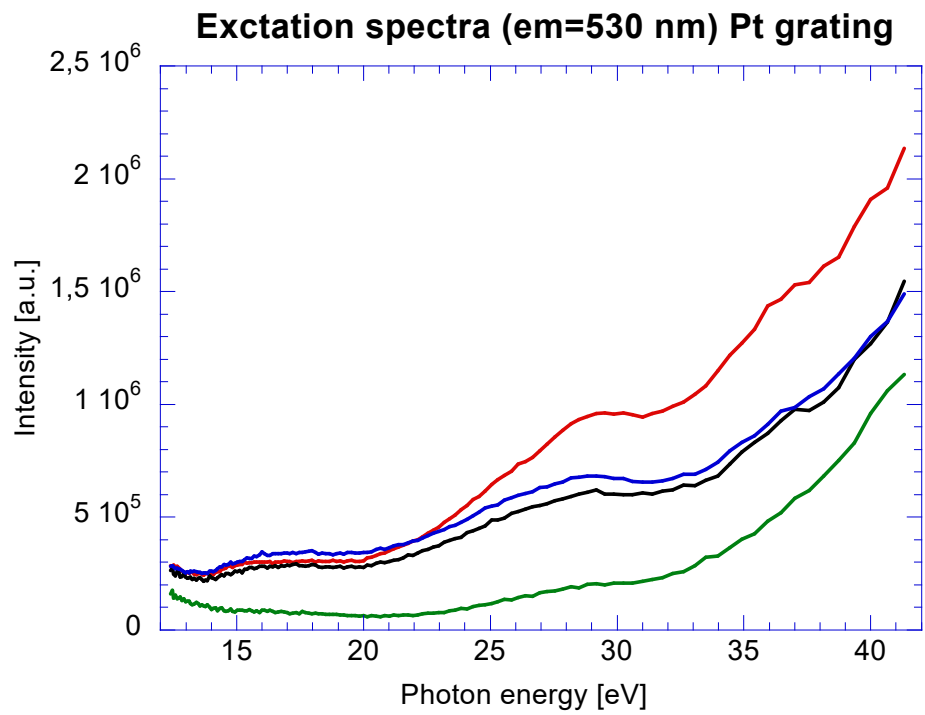

Figure S3: PLE (em= 530 nm) spectra for GYSAG series over 12.4 eV nm using Pt grating.

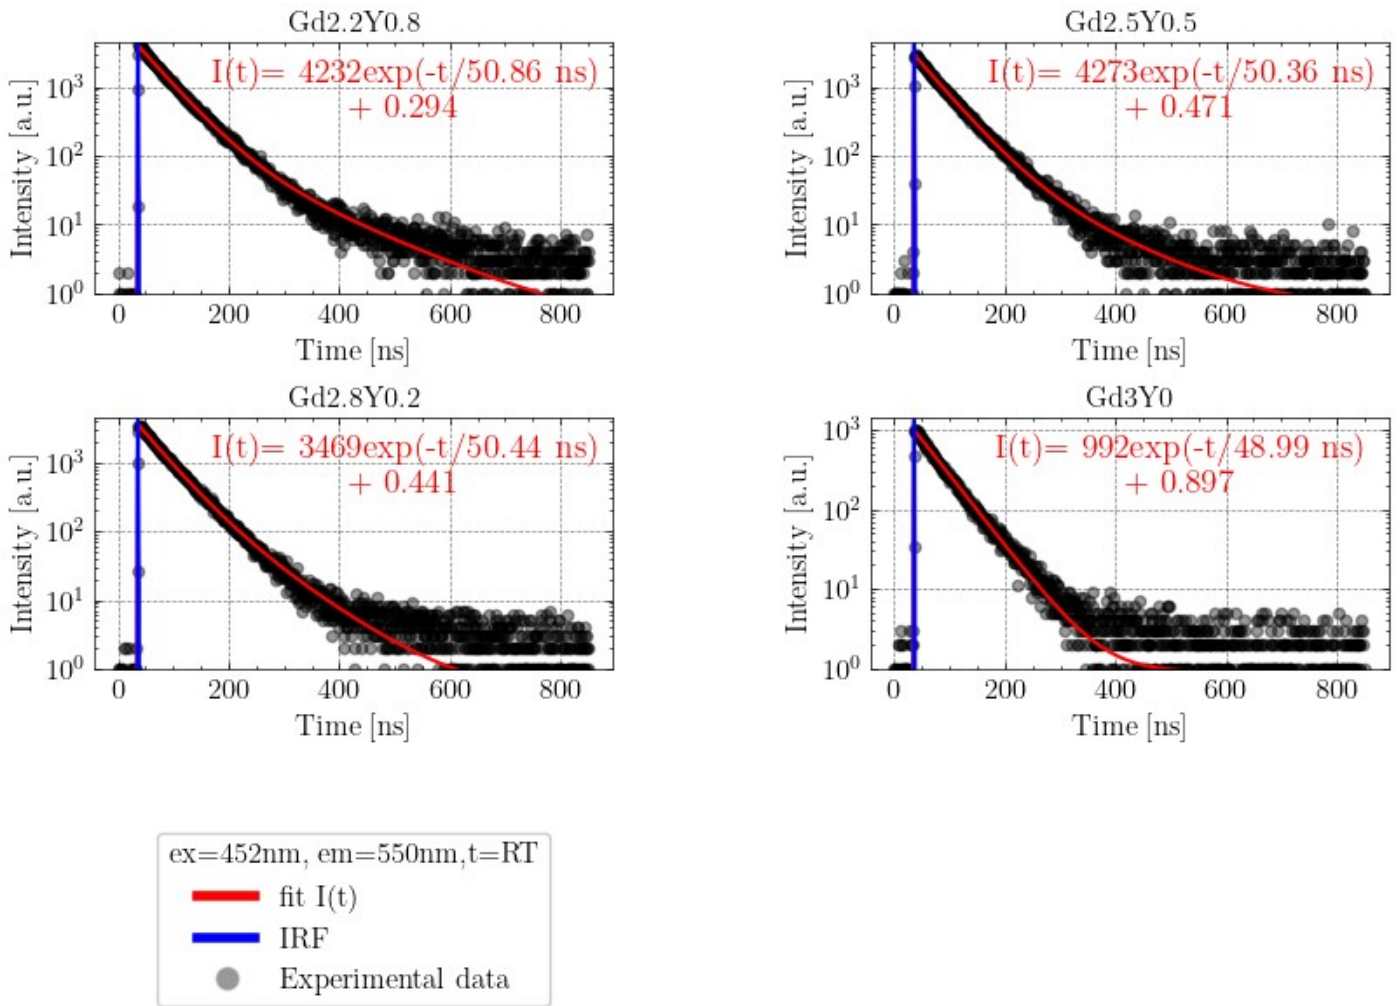

Figure S4: PL decay curves of GYSAG:Ce set under nanoLED-pulse excitation at RT ( $exc=452\text{ nm}$ ,  $em=550\text{ nm}$ ). The fit (red line) is a convolution of the instrumental response and function  $I(t)$  in the figure.

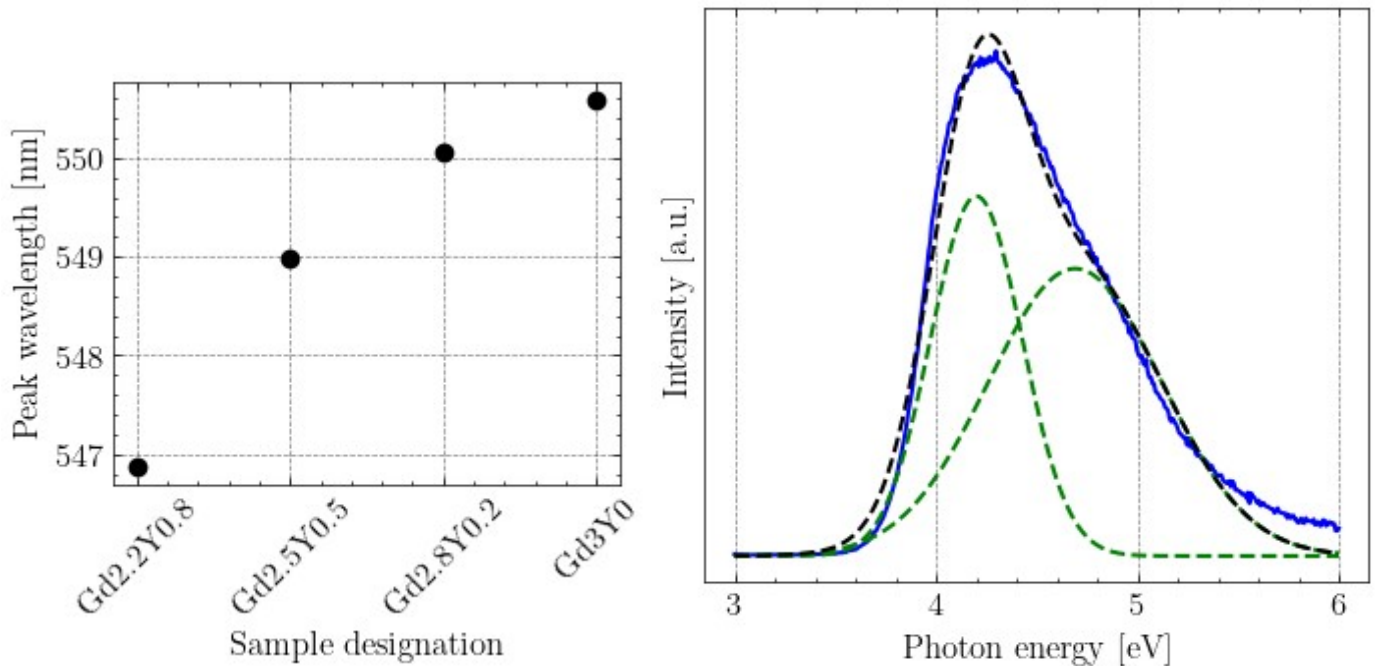

Figure S5: a) Peak position from RL of  $5d_1-4f_{1,2}$  transition of  $Ce^{3+}$ . b) Example of fit of doublet peak with two Gaussian functions (green), sum (black), and (blue) raw data for Gd3Y0.
